# Supplementary material
Source: PubMed Central journal article supplement (PMC5865025)
Supplement: IAI.00717-17_zii999092372s1.pdf [file IAI.00717-17_zii999092372s1.pdf]

## Supplemental information

**Video 1.** Time-lapse two-photon images of OT-I cells and 2C cells in a cluster formed in the liver. A C57BL/6 mouse received activated CD8<sup>+</sup> T cells from a GFP/OT-I mouse and activated CD8<sup>+</sup> T cells from a DsRed/2C mouse and was infected with PbA-gfpOVA sporozoites. Intravital imaging of the liver was performed 44 h after infection in four dimensions (x, y, z, and time-lapse) using inverted two-photon microscope and analyzed using Imaris software. The time interval between each scan is 42 s. The images are composed of Z-projection images of 40 Z-stacks (each 1.5 μm).

**Video 2.** Time-lapse two-photon video of OT-I cells and CD11c cells in contact in an early-phase cluster formed in the liver. A CD11c-YFP mouse received activated CD8<sup>+</sup> T cells from a DsRed/OT-I mouse and was infected with PbA-gfpOVA sporozoites. Intravital imaging of the liver was performed 44 h after infection in four dimensions (x, y, z, and time-lapse) using inverted two-photon microscope and analyzed using Imaris software. The large yellow body represents PbA-gfpOVA parasites within an infected hepatocyte. The time interval between each scan is 36 s. The images are composed of Z-projection images of 41 Z-stacks (each 1.5 μm).

**Video 3.** Time-lapse two-photon video image of OT-I cells and CD11c<sup>+</sup> dendritic cells in contact in a cluster formed in the liver. A CD11c-YFP mouse received CD8<sup>+</sup> T cells from a DsRed/OT-I mouse and was infected with PbA-gfpOVA sporozoites. Intravital imaging of the liver was performed 44 h after infection in four dimensions (x, y, z, and time-lapse) using inverted two-photon microscope and analyzed using the Imaris software. The time interval between each scan is 29 s. The images are composed of Z-projection images of 44 Z-stacks (each 1.5 μm).
